# Supplementary material
Source: PubMed Central journal article supplement (PMC4866927)

**Appendix 1 (as supplied by the authors):** Decision-tree model for pharmacy-based TO versus in-person examination

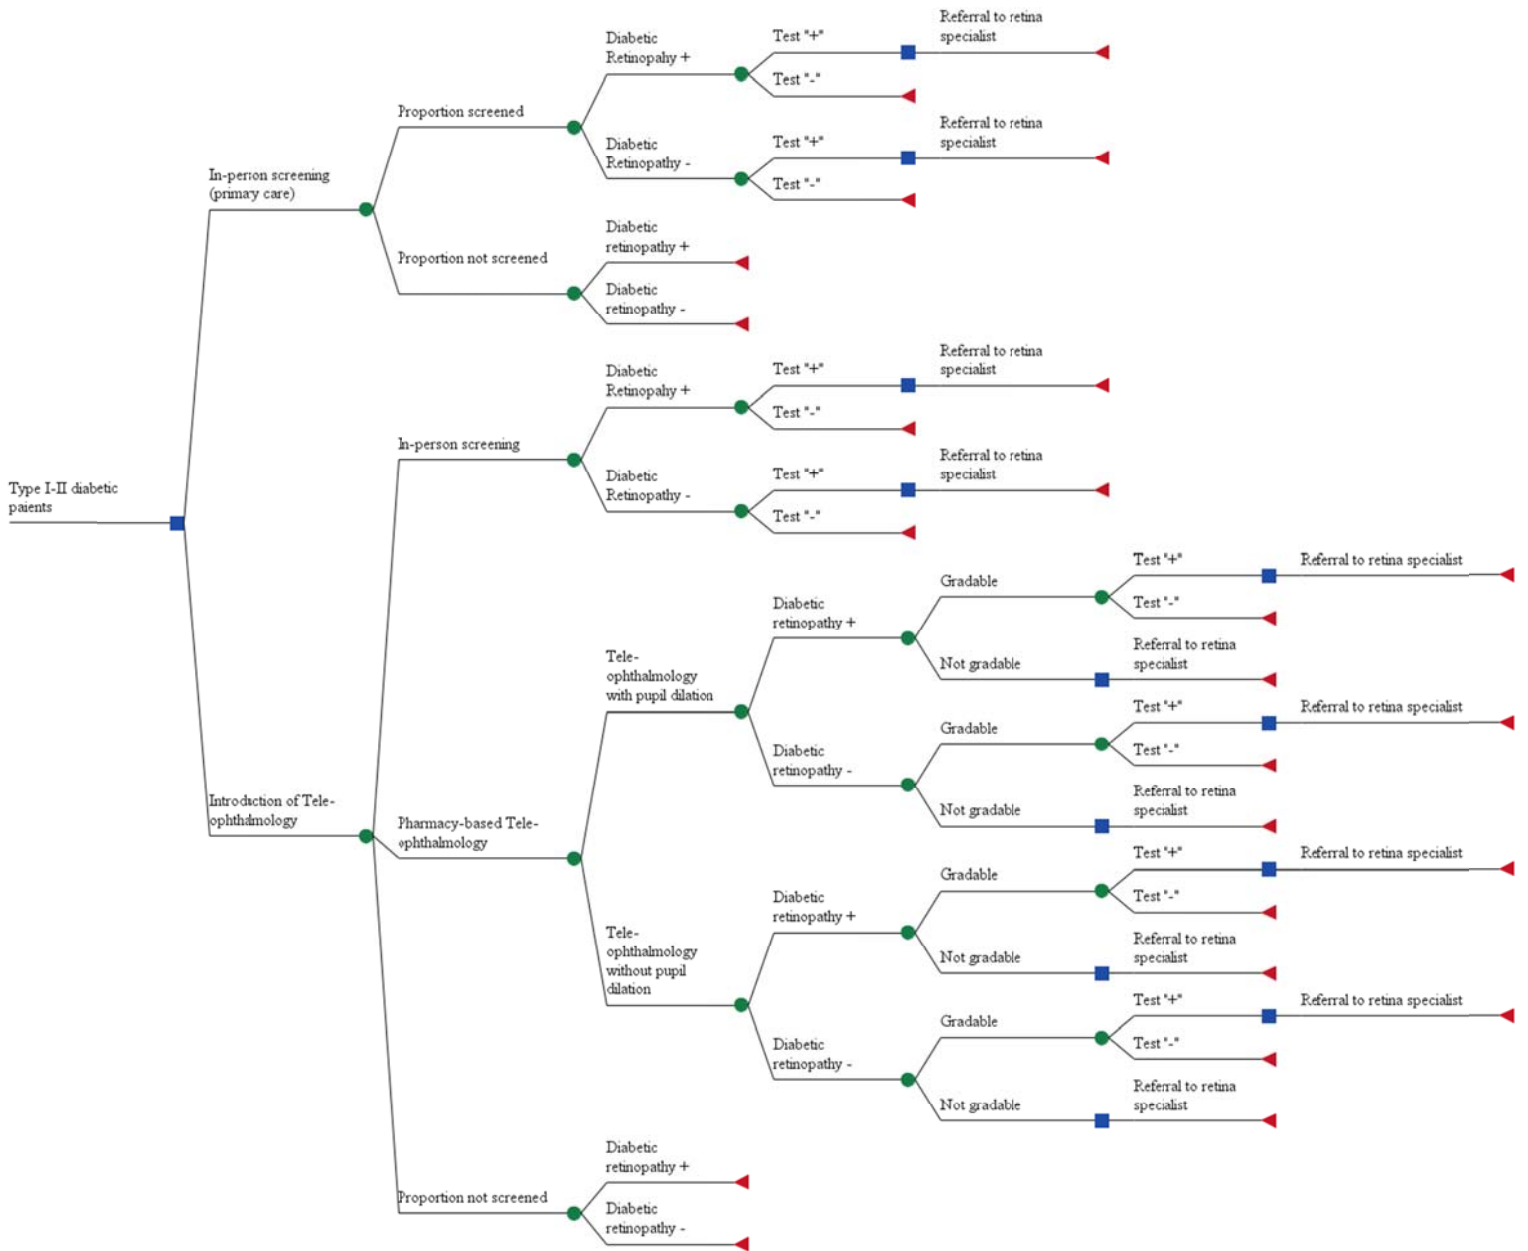

Supplement: supp_4.1.E95_2015-0085-1-at.pdf [file supp_4.1.E95_2015-0085-1-at.pdf]
