# Supplementary material
Source: PubMed Central journal article supplement (PMC4866927)
Supplement: supp_4.1.E95_2015-0085-2-at.pdf [file supp_4.1.E95_2015-0085-2-at.pdf]

**Appendix 2 (as supplied by the authors):** Model calculations TO arm for probability of screening with TO

After the introduction of the new screening intervention, the patient could choose between two screening alternatives, namely in-person examination or TO, or no screening at all. To calculate the screening rate of TO examinations ( $P_{(tele)}$ ), we used the following formula that considered the increased screening compliance after the introduction of TO ( $V$ ) and the proportion of screening examinations with TO based on screening preference ( $T$ ), as follows

$$P_{(tele)} = T (P_{(ref)} \times V) , V \geq 1, P_{(tele)} < 1 \quad (1)$$

In this equation, " $P_{(ref)} \times V$ " is the overall screening rate after the introduction of the TO program (in-person examination and TO combined), and " $P_{(tele)}$ " is the proportion of those examinations that correspond to TO screening.

Both patients' preferences ( $T$ ) and screening compliance after TO ( $V$ ) were derived from published literature. For the base-case model, the volume increase in DR examinations after tele-screening ( $V$ ) was set to 10%, with 40% of patients favoring pharmacy-based TO examination over the comparator.<sup>40</sup> Hence, the screening probability for the TO arm was 0.562.
