# Supplementary material
Source: PubMed Central journal article supplement (PMC4866927)

**Appendix 3 (as supplied by the authors):** Pharmacy-based TO locations in Chatham–Kent (green diamonds) and the van route (green lines). Adapted from URL page: <http://www.kent.net/zionunited/location.html>

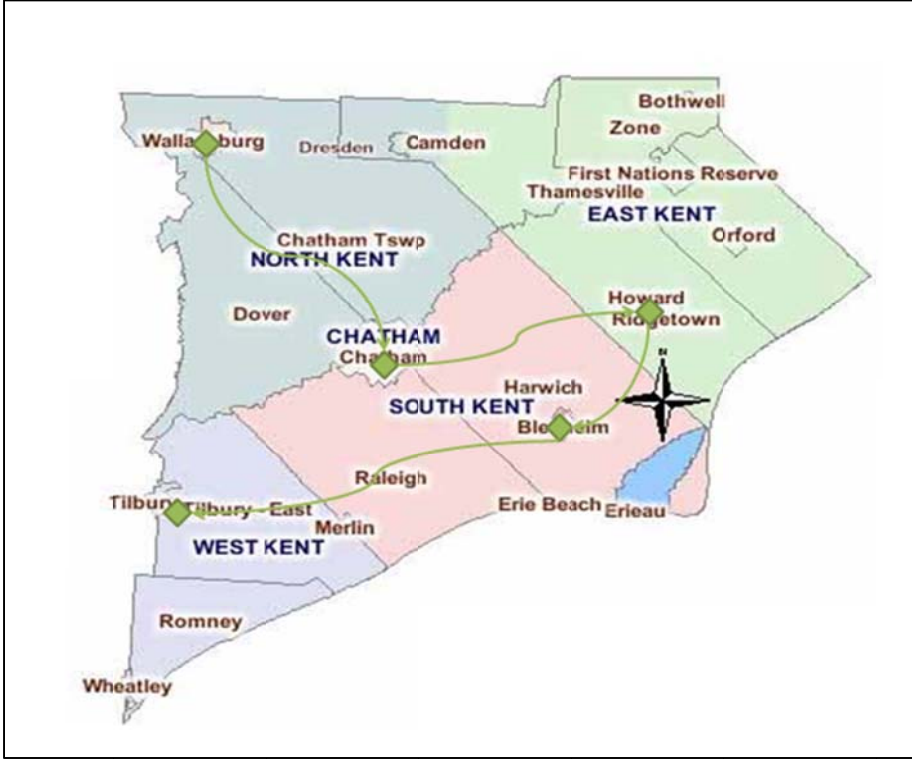

Supplement: supp_4.1.E95_2015-0085-3-at.pdf [file supp_4.1.E95_2015-0085-3-at.pdf]
